# Supplementary material for: Visible light-induced switching of soft matter materials properties based on thioindigo photoswitches
Source: PubMed Central journal article supplement (PMC10721821; doi:10.1038/s41467-023-44128-8), 2023-12-14
Supplement: 41467_2023_44128_MOESM3_ESM.pdf [file 41467_2023_44128_MOESM3_ESM.pdf]

## **Description of Additional Supplementary Files**

**File Name:** Supplementary Data 1

**Description:** Atomic coordinates of selected molecules calculated based on DFT/TD-DFT methods.
